# Supplementary material
Source: publisher site journal article supplement (https://www.dovepress.com/article/552175)
Supplement: Supplementary file 1 [file 552175%20Supplementary%20Material.docx]

**Supporting Information**

**Polysarcosine-functionalized graphene oxide improves biological safety and** **enhances Chemo-Photothermal therapy synergistic anticancer effect**

Weiwei Ma1,*, Yan zhang2,*, Xuejing Zhai1, Qian Qu1, Xueying Guo1, Sen Zhang1, Ruiyao Hou1, Ping Lu2, Yanyan Yin1

1College of Pharmacy, Xinxiang Medical University, Xinxiang, People’s Republic of China; 2Department of Oncology, The First Affiliated Hospital of Xinxiang Medical University, Xinxiang, People’s Republic of China

*These authors contributed equally to this work

Correspondence: Weiwei Ma, College of Pharmacy, Xinxiang Medical University, Xinxiang, 453003, People’s Republic of China, Tel +86 0373 3029879, Fax +86 0373 3029879, Email [081011@xxmu.edu.cn](mailto:081011@xxmu.edu.cn); Yanyan Yin, Email 105772801@qq.com.


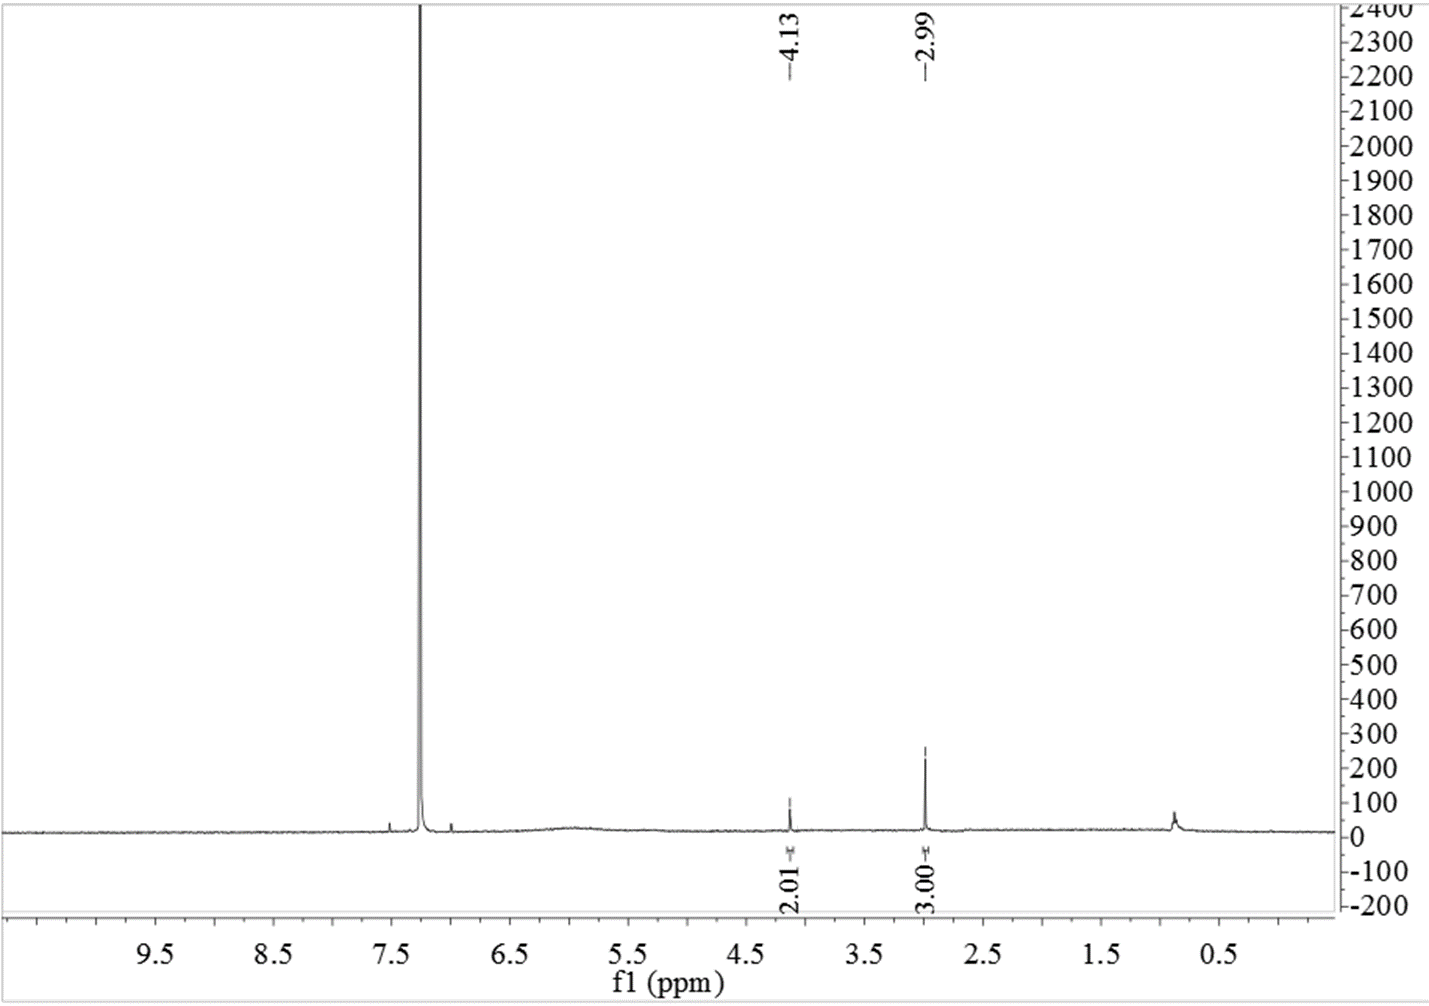


Figure S1. 1H-NMR spectrum of Sar-NCA.


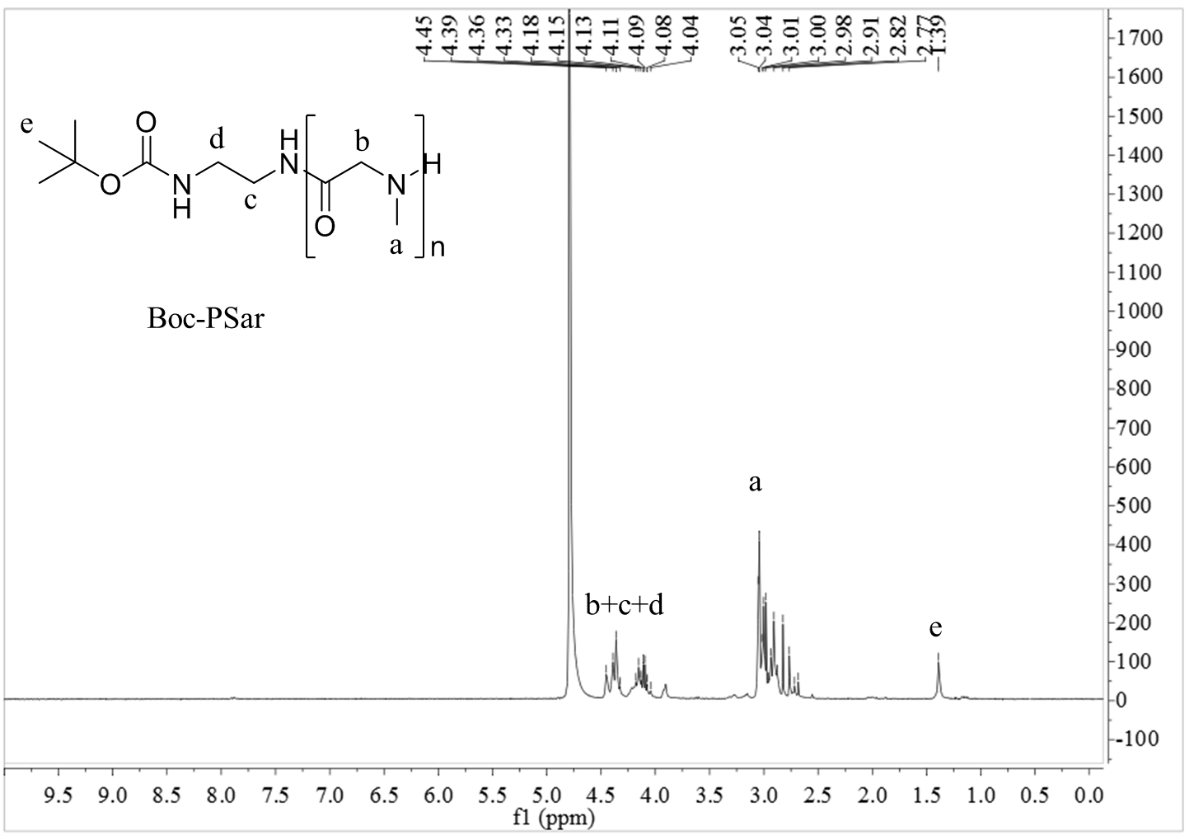


Figure S2. 1H-NMR spectrum of Boc-PSar.


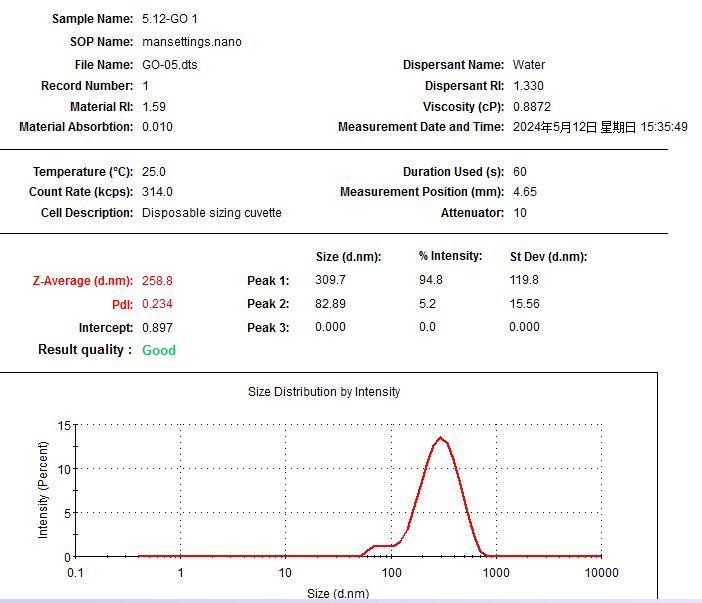


Figure S3. Particle size distribution of GO.


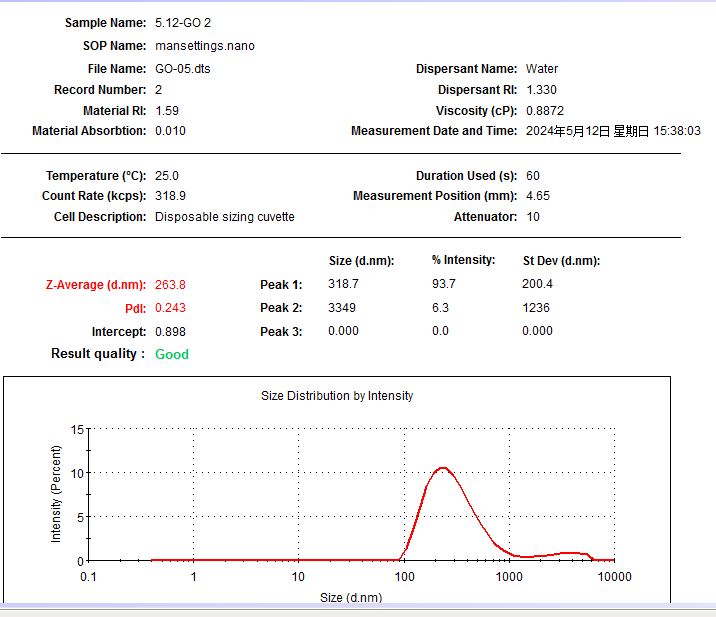


Figure S4. Particle size distribution of B-PSar-GO.

**y = 0.0247x + 0.0059**

**R² = 0.9998**

Figure S5. Ultraviolet curves and standard curve of DOX solutions (insert).
